# Supplementary material
Source: PubMed Central journal article supplement (PMC8936763)
Supplement: bmjstel-2019-000512supp001.pdf [file bmjstel-2019-000512supp001.pdf]

## Supplement 1. DASH-SV median scores over time

| Session number                                                                                                     |                   |    |                   |    |                   |    |                   |    |                   |    |                   |    |                   |    |                   |    |
|--------------------------------------------------------------------------------------------------------------------|-------------------|----|-------------------|----|-------------------|----|-------------------|----|-------------------|----|-------------------|----|-------------------|----|-------------------|----|
|                                                                                                                    | 1                 | 2  | 3                 | 4  | 5                 | 6  | 7                 | 8  |                   |    |                   |    |                   |    |                   |    |
|                                                                                                                    | SV                | IV |
| <b>Element 1.</b> The instructor set the stage for an engaging learning experience (out of 7)                      | 6                 | -- | 6                 | 7  | 6                 | 5  | 6.5               | 6  | 6                 | 6  | 4                 | 6  | 4                 | 6  | 6                 | 4  |
| <b>Element 2.</b> The instructor maintained an engaging context for learning (out of 7)                            | 6.5               | 7  | 6                 | 7  | 7                 | 5  | 7                 | 6  | 6                 | 4  | --                | 4  | --                | 6  | 6                 | 5  |
| <b>Element 3.</b> The instructor structured the debriefing in an organized way (out of 7)                          | 6                 | 7  | 6.5               | 7  | 6                 | 7  | 6.3               | 5  | 6                 | 5  | 6                 | 7  | 6                 | 7  | 6                 | 6  |
| <b>Element 4.</b> The instructor provoked in-depth discussions that led me to reflect on my performance (out of 7) | 6                 | 6  | 6                 | 7  | 6                 | 7  | 6                 | 6  | 6                 | 5  | 6                 | 6  | 6                 | 6  | 6                 | 7  |
| <b>Element 5.</b> The instructor identified what I did well or poorly—and why (out of 7)                           | 6                 | 5  | 6                 | 7  | 6                 | 6  | 6.3               | 6  | 6                 | 6  | 6                 | 6  | 5.5               | 7  | 5                 | 7  |
| <b>Element 6.</b> The instructor helped me see how to improve or how to sustain good performance (out of 7)        | 6                 | 7  | 6.5               | 6  | 7                 | 7  | 6.3               | 5  | 6                 | 4  | 6                 | 6  | 6                 | 6  | 6                 | 7  |
| <b>Total rating</b> (average of 29 elements), median (IQR) (out of 100)                                            | 89<br>(86,<br>98) | 89 | 89<br>(86,<br>93) | 94 | 93<br>(88,<br>93) | 83 | 90<br>(79,<br>94) | 81 | 86<br>(79,<br>94) | 75 | 83<br>(71,<br>86) | 86 | 83<br>(71,<br>86) | 84 | 80<br>(78,<br>85) | 87 |
