# Supplementary material
Source: PubMed Central journal article supplement (PMC8936763)
Supplement: bmjstel-2019-000512supp002.pdf [file bmjstel-2019-000512supp002.pdf]

**Supplement 2. DASH-student version intraclass correlation coefficients**

|                     | <b>ICC (95% CI)</b>   | <b>p-value</b> |
|---------------------|-----------------------|----------------|
| Session 1: 6/13/17  | 0.325 (-0.196, 0.678) | 0.089          |
| Session 2: 6/21/17  | 0.504 (0.107, 0.762)  | 0.009          |
| Session 4: 7/28/17  | 0.682 (0.372, 0.896)  | <0.001         |
| Session 5: 8/22/17  | 0.505 (0.93, 0.775)   | 0.011          |
| Session 6: 2/9/18   | 0.846 (0.738, 0.921)  | <0.001         |
| Session 7: 2/12/18  | 0.730 (0.514, 0.865)  | <0.001         |
| Session 8: 10/18/18 | 0.816 (0.508, 0.970)  | <0.001         |
